# Supplementary material
Source: publisher figshare collection journal article supplement (https://acs.figshare.com/ndownloader/files/4285366)
Supplement: Supplementary file 1 [file 4285366]

data_global_cpd9
_audit_creation_date        09-07-06
_audit_creation_method CRYSTALS_ver_12.86

_oxford_structure_analysis_title  'Traian 010709a in P2(1)/c'
_chemical_name_systematic         ?
_chemical_melting_point           ?

#looking for refcif 
 
 
# Check this file using the IUCr facility at: 
# http://checkcif.iucr.org/ 
 
# The content below is held in the file 'script/refcif.dat'. This is a text 
# file which you may edit to reflect local conditions. 
# Items which need looking at are represented by a '?'. 
# Items for which there are choices are prefixed with 'choose from'. 
 
_publ_contact_letter 
; 
; 
_publ_contact_author_name         'JP Sutter' 
_publ_contact_author_address 
; 
; 
 
_publ_contact_author_phone        '(33) 5 61 33 31 57' 
_publ_contact_author_fax          '(33) 5 61 55 30 03' 
_publ_contact_author_email        'jean-pascal.sutter@lcc-toulouse.fr ' 
_publ_requested_journal           'Inorg. Chem' 
_publ_requested_category          EO # choose from: FI FM FO CI CM CO AD 
_publ_requested_coeditor_name     '' 
 
_publ_section_title 
# Title of paper - generally just the systematic or trivial name 
; 
Preparation, crystal structures, 
and Magnetic Features for a Series 
of Dinuclear NiIILnIII Schiff-base Complexes.
; 
 
# The loop structure below should contain the names and addresses of all 
# authors, in the required order of publication. Repeat as necessary. 
loop_ 
 _publ_author_name 
 _publ_author_address 
 _publ_author_footnote 
 'Traian D. Pasatoiu' # Author 1 
; 
 ? # Address for author 1 
; 
; 
 ? # Footnote for author 1 
; 
 'Augustin M. Madalan' # Author 2 
; 
 ? # Address 2 
; 
; 
 ? # Footnote 2 
; 
 'Fatema Zohra Chiboub Fellah' # Author 2 
; 
 ? # Address 2 
; 
; 
 ? # Footnote 2 
; 
 'Carine Duhayon' # Author 2 
; 
 ? # Address 2 
; 
; 
 ? # Footnote 2 
; 
 'Jean Pascal Sutter ' # Author 2 
; 
 ? # Address 2 
; 
; 
 ? # Footnote 2 
; 
 'Marius Andruh' # Author 2 
; 
 ? # Address 2 
; 
; 
 ? # Footnote 2 
;  
 
_publ_section_abstract 
# Text of the abstract 
# (a) The Abstract must be self-contained and comprehensible 
# without the rest of the paper. This means no references 
# to atom names or to compound numbers; compounds must be 
# identified as the title compound, or by name or by some other 
# means such as derivatives of each other (e.g. "the 
# corresponding ketone"). 
# (b) The chemical formula of "the title compound" must be given. 
# (c) Any crystallographic molecular symmetry should be 
# mentioned, and also the presence of more than one molecule 
# in the asymmetric unit (i.e. anything other than Z'=1). 
; 
? 
; 
 
_publ_section_related_literature  # Not in version 2.3.1 
############################################################### 
# Essential references (e.g. to the origin of the material studied, related 
# structural studies, and to information supporting the reported structure) 
# should be cited in this section, with appropriate very brief explanatory 
# text, for example `The synthesis of the complex is described by Jones 
# (2001). The anhydrous complex has essentially the same coordination 
# geometry (Smith, 2003).' In addition, all references included in the 
# supplementary materials, but not elsewhere in the published article, 
# should be given here. The simple text `For related literature, see:...' 
# may be used, but further details should be provided in the Comment 
# section, which forms part of the supplementary material. 
############################################################### 
; 
? 
; 
 
_publ_section_comment 
# Text of the paper 
# Note that atoms are referenced as N2, not N(2) or N~2~ 
# If text containing () occur within (), the outer ones should be [] 
# Figures should be referenced as Fig. 
; 
? 
; 
_publ_section_acknowledgements    # Acknowledgments 
; 
? 
; 
_publ_section_figure_captions 
# Captions to figures - Start each caption on a new line after a blank line 
; 
; 
 
 
data_1 
 
_publ_section_exptl_refinement 
# Some potentially useful phrases are donated by Bill Clegg: 
; 

 
The H atoms were refined with riding constraints. 
 
; 
 
_publ_section_exptl_prep 
# Brief details or a reference. Include solvent if known 
; 
? 
; 
 
# Hand-made tables can be put in the cif. The number of columns 
# is set in the loop header. 
# The contants of each column can either be a piece of text 
# without any spaces (eg a number) or other text enclosed in " " 
# Remove the leading # in the following example 
 
#geom_extra_table_head_A 
#; 
#Table 2. 
#Molecular parameters deviating most from MOGUL averages 
#; 
# 
#loop_ 
#_geom_extra_tableA_col_1 
#_geom_extra_tableA_col_2 
#_geom_extra_tableA_col_3 
#_geom_extra_tableA_col_4 
# 
#Parameter "Observed Value" "MOGUL Value" "MOGUL e.s.d" 
#N5-C6-C4 129 124 "7 (\%)" 
#C3-O10-C2 105 109 "2 (\%)" 
#C6-O7 1.25 1.22 ".02 (\%A)" 
# 
# End of 'script/refcif-b.dat' 
#end of refcif 
_cell_length_a                    13.5166(2)
_cell_length_b                    10.4131(2)
_cell_length_c                    24.2996(5)
_cell_angle_alpha                 90
_cell_angle_beta                  98.6689(18)
_cell_angle_gamma                 90
_cell_volume                      3381.09(11)
 
_symmetry_cell_setting            'Monoclinic' 
_symmetry_space_group_name_H-M    'P 1 21/c 1 ' 
_symmetry_space_group_name_Hall   '-P 2ybc ' 
loop_
 _symmetry_equiv_pos_as_xyz
 'x,y,z'
 '-x,-y,-z'
 '-x,y+1/2,-z+1/2'
 'x,-y+1/2,z+1/2'

loop_
_atom_type_symbol
_atom_type_scat_dispersion_real
_atom_type_scat_dispersion_imag
_atom_type_scat_Cromer_Mann_a1
_atom_type_scat_Cromer_Mann_b1
_atom_type_scat_Cromer_Mann_a2
_atom_type_scat_Cromer_Mann_b2
_atom_type_scat_Cromer_Mann_a3
_atom_type_scat_Cromer_Mann_b3
_atom_type_scat_Cromer_Mann_a4
_atom_type_scat_Cromer_Mann_b4
_atom_type_scat_Cromer_Mann_c
_atom_type_scat_source  
 C       0.0033   0.0016   2.3100  20.8439   1.0200  10.2075   1.5886   0.5687
   0.8650  51.6512   0.2156 'International Tables Vol C 4.2.6.8 and 6.1.1.4'
 H       0.0000   0.0000   0.4930  10.5109   0.3229  26.1257   0.1402   3.1424
   0.0408  57.7998   0.0030 'International Tables Vol C 4.2.6.8 and 6.1.1.4'
 N       0.0061   0.0033  12.2126   0.0057   3.1322   9.8933   2.0125  28.9975
   1.1663   0.5826 -11.5290 'International Tables Vol C 4.2.6.8 and 6.1.1.4'
 O       0.0106   0.0060   3.0485  13.2771   2.2868   5.7011   1.5463   0.3239
   0.8670  32.9089   0.2508 'International Tables Vol C 4.2.6.8 and 6.1.1.4'
 Ni      0.3393   1.1124  12.8376   3.8785   7.2920   0.2565   4.4438  12.1763
   2.3800  66.3421   1.0341 'International Tables Vol C 4.2.6.8 and 6.1.1.4'
 Mo     -1.6832   0.6857   3.7025   0.2772  17.2356   1.0958  12.8876  11.0040
   3.7429  61.6584   4.3875 'International Tables Vol C 4.2.6.8 and 6.1.1.4'
 Dy     -0.1892   4.4098  26.5070   2.1802  17.6383   0.2022  14.5596  12.1899
   2.9658 111.8740   4.2973 'International Tables Vol C 4.2.6.8 and 6.1.1.4'
 
 
_cell_formula_units_Z                    4

# Given Formula = C23 H36 Dy1 N7 Ni1 O18 
# Dc =      1.81 Fooo =   1844.00 Mu =     28.37 M =    919.79
# Found Formula = C23 H36 Dy1 N7 Ni1 O18 
# Dc =      1.81 FOOO =   1844.00 Mu =     28.37 M =    919.79

_chemical_formula_sum             'C23 H36 Dy1 N7 Ni1 O18'
_chemical_formula_moiety   'C21 H31 Dy N4 Ni O11, C2 H3 N, 2(N O3), H2 O'
_chemical_compound_source                ?
_chemical_formula_weight            919.79
 
 
_cell_measurement_reflns_used        24930
_cell_measurement_theta_min              3
_cell_measurement_theta_max             29
_cell_measurement_temperature          180
 
_exptl_crystal_description        'block' 
_exptl_crystal_colour             'violet' 
_exptl_crystal_size_min           0.25 
_exptl_crystal_size_mid           0.25 
_exptl_crystal_size_max           0.25 
 
_exptl_crystal_density_diffrn     1.807 
_exptl_crystal_density_meas       ? 
_exptl_crystal_density_method     'not measured' 
# Non-dispersive F(000): 
_exptl_crystal_F_000              1844 
_exptl_absorpt_coefficient_mu     2.837 
 
# Sheldrick geometric approximatio 0.49 0.49 
_exptl_absorpt_correction_type    multi-scan 
_exptl_absorpt_process_details    'Blessing, acta cryst. (1995), a51, 33-38' 
_exptl_absorpt_correction_T_min   0.46 
_exptl_absorpt_correction_T_max   0.49 
_diffrn_measurement_device        'Oxford Diffraction XCALIBUR' 
_diffrn_measurement_device_type   'Area' 
_diffrn_radiation_monochromator   'graphite' 
_diffrn_radiation_type            'Mo K\a'
_diffrn_radiation_wavelength           0.71073
_diffrn_measurement_method        '\f & \w scans' 
 
# If a reference occurs more than once, delete the author 
# and date from subsequent references. 
_computing_data_collection        'Xcalibur, (Oxford Diffraction, 2002)' 
_computing_cell_refinement        'CrysAlis RED, (Oxford Diffraction, 2002)' 
_computing_data_reduction         'CrysAlis RED, (Oxford Diffraction, 2002)' 
_computing_structure_solution     'SIR92 (Altomare et al., 1994)' 
_computing_structure_refinement   'CRYSTALS (Betteridge et al., 2003)' 
_computing_publication_material   'CRYSTALS (Betteridge et al., 2003)' 
_computing_molecular_graphics     'CAMERON (Watkin et al., 1996)' 
 
_diffrn_standards_interval_time   . 
_diffrn_standards_interval_count  . 
_diffrn_standards_number          0 
_diffrn_standards_decay_%         ? 
 
_diffrn_ambient_temperature        180
_diffrn_reflns_number             31666 
_reflns_number_total              9015 
_diffrn_reflns_av_R_equivalents   0.022 
# Number of reflections with Friedels Law is 9015 
# Number of reflections without Friedels Law is 0 
# Theoretical number of reflections is about 9064 
 
 
_diffrn_reflns_theta_min          3.049 
_diffrn_reflns_theta_max          29.087 
_diffrn_measured_fraction_theta_max 0.993 
 
_diffrn_reflns_theta_full         28.505 
_diffrn_measured_fraction_theta_full 0.995 
 
 
_diffrn_reflns_limit_h_min        -18 
_diffrn_reflns_limit_h_max        18 
_diffrn_reflns_limit_k_min        -14 
_diffrn_reflns_limit_k_max        9 
_diffrn_reflns_limit_l_min        -33 
_diffrn_reflns_limit_l_max        33 
_reflns_limit_h_min               -18 
_reflns_limit_h_max               18 
_reflns_limit_k_min               0 
_reflns_limit_k_max               14 
_reflns_limit_l_min               0 
_reflns_limit_l_max               33 
 
 
_atom_sites_solution_primary      direct #heavy,direct,difmap,geom
# _atom_sites_solution_secondary  difmap
_atom_sites_solution_hydrogens    geom
 
_refine_diff_density_min          -1.37 
_refine_diff_density_max          1.13 
 
 
# The current dictionary definitions do not cover the 
# situation where the reflections used for refinement were 
# selected by a user-defined sigma threshold 
 
 
# The values actually used during refinement 
_oxford_reflns_threshold_expression_ref     I>3.0\s(I)
_refine_ls_number_reflns          7935 
_refine_ls_number_restraints      0 
_refine_ls_number_parameters      451 
_oxford_refine_ls_R_factor_ref    0.0241 
_refine_ls_wR_factor_ref          0.0232 
_refine_ls_goodness_of_fit_ref    1.1112 
_refine_ls_shift/su_max           0.003305 
 
 
# The values computed from all data 
_oxford_reflns_number_all         8996 
_refine_ls_R_factor_all           0.0301 
_refine_ls_wR_factor_all          0.0244 
 
# The values computed with a 2 sigma cutoff - a la SHELX 
_reflns_threshold_expression      I>2.0\s(I)
_reflns_number_gt                 8190 
_refine_ls_R_factor_gt            0.0256 
_refine_ls_wR_factor_gt           0.0234 
 
# choose from: rm (reference molecule of known chirality), 
# ad (anomolous dispersion - Flack), rmad (rm and ad), 
# syn (from synthesis), unk (unknown) or . (not applicable). 
_chemical_absolute_configuration  '.' 
 
 
_refine_ls_structure_factor_coef  F 
_refine_ls_matrix_type            full
_refine_ls_hydrogen_treatment     constr         # none, undef, noref, refall,
                                                 # refxyz, refU, constr or mixed
_refine_ls_weighting_scheme       calc 
_refine_ls_weighting_details 
;
 Method, part 1, Chebychev polynomial, (Watkin, 1994, Prince, 1982) 
 [weight] = 1.0/[A~0~*T~0~(x)+A~1~*T~1~(x) ... +A~n-1~]*T~n-1~(x)] 
 where A~i~ are the Chebychev coefficients listed below and x= Fcalc/Fmax 
 Method = Robust Weighting (Prince, 1982) 
 W = [weight] * [1-(deltaF/6*sigmaF)^2^]^2^ 
 A~i~ are: 
 9.94 -9.42 5.96 
;
# Insert your own references if required - in alphabetical order 
_publ_section_references 
; 
Altomare, A., Cascarano, G., Giacovazzo, C., Guagliardi, A., Burla, M.C., 
Polidori, G. & Camalli, M. (1994). J. Appl. Cryst. 27, 435. 
 
Betteridge, P.W., Carruthers, J.R., Cooper, R.I., 
Prout, K. & Watkin, D.J. (2003). J. Appl. Cryst. 36, 1487. 
 
Otwinowski, Z. & Minor, W. (1997). Methods in Enzymology, Vol. 276, 
edited by C. W. Carter Jr & R. M. Sweet, pp. 307--326. 
New York: Academic Press. 
 
Oxford Diffraction, (2002). CrysAlis RED. 
 
Oxford Diffraction, (2002). Xcalibur User Manual. 
 
Prince, E. 
Mathematical Techniques in Crystallography 
and Materials Science 
Springer-Verlag, New York, 1982. 
 
Watkin D.J. (1994). 
Acta Cryst, A50, 411-437. 
 
Watkin, D.J., Prout, C.K. & Pearce, L.J. (1996). CAMERON, Chemical 
Crystallography Laboratory, Oxford, UK. 
; 

# Uequiv = arithmetic mean of Ui i.e. Ueqiv = (U1+U2+U3)/3

# Replace last . with number of unfound hydrogen atomsattached to an atom.

# ..._refinement_flags_... 
# . no refinement constraints           S special position constraint on site
# G rigid group refinement of site      R riding atom
# D distance or angle restraint on site T thermal displacement constraints
# U Uiso or Uij restraint (rigid bond)  P partial occupancy constraint


loop_
_atom_site_label
_atom_site_type_symbol
_atom_site_fract_x
_atom_site_fract_y
_atom_site_fract_z
_atom_site_U_iso_or_equiv
_atom_site_occupancy
_atom_site_adp_type
_atom_site_refinement_flags_posn
_atom_site_refinement_flags_adp
_atom_site_refinement_flags_occupancy
_atom_site_disorder_assembly
_atom_site_disorder_group
_oxford_atom_site_special_shape
_atom_site_attached_hydrogens
O15 O 0.35794(15) 0.00616(17) 0.52969(8) 0.0342 1.0000 Uani . . . . . . . 
O16 O 0.27492(15) 0.10279(17) 0.45865(7) 0.0318 1.0000 Uani . . . . . . . 
O17 O 0.27917(15) 0.1823(2) 0.54086(9) 0.0397 1.0000 Uani . . . . . . . 
N7 N 0.30292(15) 0.09838(19) 0.51054(8) 0.0230 1.0000 Uani . . . . . . . 
O12 O 0.04753(14) 0.6621(2) 0.52748(8) 0.0339 1.0000 Uani . . . . . . . 
O13 O 0.02157(14) 0.80830(19) 0.58622(9) 0.0349 1.0000 Uani . . . . . . . 
O14 O 0.17244(13) 0.7615(2) 0.57485(8) 0.0356 1.0000 Uani . . . . . . . 
N6 N 0.07995(15) 0.7442(2) 0.56245(8) 0.0224 1.0000 Uani . . . . . . . 
O1 O 0.07949(11) 0.76766(14) 0.40512(7) 0.0182 1.0000 Uani . . . . . . . 
O2 O 0.12071(10) 0.55640(13) 0.35717(6) 0.0142 1.0000 Uani . . . . . . . 
O3 O 0.30122(10) 0.47910(13) 0.38395(6) 0.0142 1.0000 Uani . . . . . . . 
O4 O 0.42602(11) 0.63622(14) 0.43830(6) 0.0170 1.0000 Uani . . . . . . . 
O5 O 0.19506(12) 0.77935(16) 0.30803(7) 0.0238 1.0000 Uani . . . . . . . 
O6 O 0.34360(12) 0.69997(15) 0.32315(7) 0.0223 1.0000 Uani . . . . . . . 
O7 O 0.28960(17) 0.7877(2) 0.24328(8) 0.0411 1.0000 Uani . . . . . . . 
O8 O 0.19711(12) 0.54897(15) 0.47344(7) 0.0213 1.0000 Uani . . . . . . . 
O9 O 0.32567(12) 0.89380(15) 0.39803(7) 0.0218 1.0000 Uani . . . . . . . 
O10 O 0.26456(13) 0.78902(15) 0.48685(7) 0.0221 1.0000 Uani . . . . . . . 
O11 O 0.15867(11) 0.31664(14) 0.42008(6) 0.0171 1.0000 Uani . . . . . . . 
N1 N 0.04804(13) 0.32048(17) 0.30514(7) 0.0177 1.0000 Uani . . . . . . . 
N2 N 0.26890(14) 0.23429(16) 0.32754(7) 0.0166 1.0000 Uani . . . . . . . 
N3 N 0.27647(15) 0.75665(18) 0.28964(8) 0.0210 1.0000 Uani . . . . . . . 
N4 N 0.21014(15) 0.46034(18) 0.26206(8) 0.0221 1.0000 Uani . . . . . . . 
C1 C 0.05576(19) 0.8922(2) 0.42469(11) 0.0269 1.0000 Uani . . . . . . . 
C2 C -0.00093(14) 0.6863(2) 0.38826(8) 0.0157 1.0000 Uani . . . . . . . 
C3 C -0.09763(17) 0.7104(2) 0.39657(10) 0.0238 1.0000 Uani . . . . . . . 
C4 C -0.17283(17) 0.6230(3) 0.37725(11) 0.0275 1.0000 Uani . . . . . . . 
C5 C -0.14976(16) 0.5138(2) 0.35031(10) 0.0227 1.0000 Uani . . . . . . . 
C6 C -0.05098(15) 0.48645(19) 0.34261(8) 0.0157 1.0000 Uani . . . . . . . 
C7 C 0.02563(14) 0.57358(18) 0.36214(8) 0.0132 1.0000 Uani . . . . . . . 
C8 C -0.03542(16) 0.3689(2) 0.31315(9) 0.0187 1.0000 Uani . . . . . . . 
C9 C 0.04361(19) 0.2004(2) 0.27302(10) 0.0268 1.0000 Uani . . . . . . . 
C10 C 0.11546(19) 0.1011(2) 0.30139(10) 0.0252 1.0000 Uani . . . . . . . 
C11 C 0.22370(18) 0.1240(2) 0.29503(10) 0.0240 1.0000 Uani . . . . . . . 
C12 C 0.36293(17) 0.2278(2) 0.34327(9) 0.0188 1.0000 Uani . . . . . . . 
C13 C 0.42838(15) 0.3251(2) 0.37173(9) 0.0176 1.0000 Uani . . . . . . . 
C14 C 0.53189(18) 0.2981(2) 0.38017(11) 0.0258 1.0000 Uani . . . . . . . 
C15 C 0.60043(17) 0.3842(3) 0.40571(11) 0.0277 1.0000 Uani . . . . . . . 
C16 C 0.56825(16) 0.4992(2) 0.42644(10) 0.0233 1.0000 Uani . . . . . . . 
C17 C 0.46750(15) 0.52640(19) 0.41887(8) 0.0155 1.0000 Uani . . . . . . . 
C18 C 0.39548(14) 0.44260(19) 0.39062(8) 0.0140 1.0000 Uani . . . . . . . 
C19 C 0.49520(17) 0.7210(2) 0.47128(10) 0.0221 1.0000 Uani . . . . . . . 
C20 C 0.22412(17) 0.4859(2) 0.21866(9) 0.0216 1.0000 Uani . . . . . . . 
C21 C 0.2419(2) 0.5189(3) 0.16311(11) 0.0394 1.0000 Uani . . . . . . . 
Dy1 Dy 0.248883(6) 0.682661(8) 0.401393(4) 0.0111 1.0000 Uani . . . . . . . 
Ni2 Ni 0.183103(18) 0.38881(2) 0.339437(10) 0.0117 1.0000 Uani . . . . . . . 
H13 H 0.1183 0.9408 0.4304 0.0408 1.0000 Uiso R . . . . . . 
H11 H 0.0290 0.8822 0.4586 0.0410 1.0000 Uiso R . . . . . . 
H12 H 0.0084 0.9329 0.3962 0.0410 1.0000 Uiso R . . . . . . 
H31 H -0.1136 0.7856 0.4153 0.0284 1.0000 Uiso R . . . . . . 
H41 H -0.2381 0.6399 0.3830 0.0320 1.0000 Uiso R . . . . . . 
H51 H -0.2010 0.4548 0.3376 0.0269 1.0000 Uiso R . . . . . . 
H81 H -0.0939 0.3238 0.2983 0.0208 1.0000 Uiso R . . . . . . 
H91 H -0.0243 0.1670 0.2699 0.0308 1.0000 Uiso R . . . . . . 
H92 H 0.0595 0.2192 0.2359 0.0312 1.0000 Uiso R . . . . . . 
H102 H 0.1102 0.1018 0.3409 0.0290 1.0000 Uiso R . . . . . . 
H101 H 0.0970 0.0164 0.2859 0.0292 1.0000 Uiso R . . . . . . 
H112 H 0.2617 0.0472 0.3076 0.0283 1.0000 Uiso R . . . . . . 
H111 H 0.2276 0.1359 0.2559 0.0279 1.0000 Uiso R . . . . . . 
H121 H 0.3966 0.1514 0.3360 0.0215 1.0000 Uiso R . . . . . . 
H141 H 0.5529 0.2186 0.3674 0.0302 1.0000 Uiso R . . . . . . 
H151 H 0.6689 0.3662 0.4101 0.0320 1.0000 Uiso R . . . . . . 
H161 H 0.6132 0.5572 0.4451 0.0284 1.0000 Uiso R . . . . . . 
H191 H 0.4558 0.7915 0.4830 0.0323 1.0000 Uiso R . . . . . . 
H193 H 0.5310 0.6754 0.5029 0.0326 1.0000 Uiso R . . . . . . 
H192 H 0.5421 0.7518 0.4485 0.0319 1.0000 Uiso R . . . . . . 
H212 H 0.2543 0.4423 0.1438 0.0614 1.0000 Uiso R . . . . . . 
H211 H 0.2994 0.5741 0.1684 0.0611 1.0000 Uiso R . . . . . . 
H213 H 0.1843 0.5640 0.1449 0.0611 1.0000 Uiso R . . . . . . 
H3 H 0.3806 0.9026 0.3866 0.0323 1.0000 Uiso R . . . . . . 
H8 H 0.2003 0.2614 0.4333 0.0262 1.0000 Uiso R . . . . . . 
H1 H 0.1839 0.4739 0.4658 0.0326 1.0000 Uiso R . . . . . . 
H7 H 0.1040 0.2817 0.4209 0.0260 1.0000 Uiso R . . . . . . 
H4 H 0.3154 0.9598 0.4147 0.0318 1.0000 Uiso R . . . . . . 
H5 H 0.2420 0.7642 0.5158 0.0329 1.0000 Uiso R . . . . . . 
H2 H 0.1523 0.5713 0.4917 0.0323 1.0000 Uiso R . . . . . . 
H6 H 0.3000 0.8526 0.4949 0.0334 1.0000 Uiso R . . . . . . 
O18 O 0.50830(13) 0.95128(17) 0.36935(7) 0.0263 1.0000 Uani . . . . . . . 
N5 N 0.5905(2) 0.7630(3) 0.30060(14) 0.0522 1.0000 Uani . . . . . . . 
C22 C 0.5600(2) 0.6651(3) 0.28736(11) 0.0334 1.0000 Uani . . . . . . . 
C23 C 0.5215(3) 0.5394(3) 0.27008(13) 0.0425 1.0000 Uani . . . . . . . 
H232 H 0.4777 0.5078 0.2952 0.0653 1.0000 Uiso R . . . . . . 
H233 H 0.5781 0.4831 0.2702 0.0652 1.0000 Uiso R . . . . . . 
H231 H 0.4840 0.5440 0.2329 0.0656 1.0000 Uiso R . . . . . . 
H10 H 0.5441 0.9708 0.3981 0.0397 1.0000 Uiso R . . . . . . 
H9 H 0.5334 0.8964 0.3511 0.0393 1.0000 Uiso R . . . . . . 
loop_
_atom_site_aniso_label
_atom_site_aniso_U_11
_atom_site_aniso_U_22
_atom_site_aniso_U_33
_atom_site_aniso_U_23
_atom_site_aniso_U_13
_atom_site_aniso_U_12
O15 0.0428(11) 0.0181(8) 0.0358(10) -0.0033(7) -0.0130(8) -0.0011(7) 
O16 0.0449(11) 0.0232(8) 0.0253(9) -0.0033(7) -0.0008(8) 0.0100(8) 
O17 0.0371(10) 0.0425(11) 0.0411(11) -0.0205(9) 0.0106(8) 0.0029(9) 
N7 0.0226(9) 0.0184(9) 0.0278(10) -0.0052(7) 0.0038(7) -0.0061(7) 
O12 0.0325(9) 0.0400(11) 0.0294(9) -0.0125(8) 0.0054(7) -0.0045(8) 
O13 0.0317(9) 0.0309(9) 0.0468(11) -0.0090(8) 0.0212(8) 0.0007(8) 
O14 0.0226(8) 0.0541(12) 0.0317(9) -0.0124(9) 0.0089(7) -0.0062(8) 
N6 0.0249(9) 0.0245(9) 0.0195(9) 0.0016(7) 0.0087(7) -0.0002(8) 
O1 0.0163(7) 0.0117(6) 0.0265(8) -0.0055(6) 0.0030(6) 0.0023(5) 
O2 0.0124(6) 0.0111(6) 0.0190(7) -0.0012(5) 0.0016(5) 0.0018(5) 
O3 0.0112(6) 0.0112(6) 0.0200(7) -0.0018(5) 0.0018(5) 0.0013(5) 
O4 0.0132(6) 0.0146(6) 0.0220(7) -0.0032(6) -0.0017(5) -0.0006(5) 
O5 0.0207(7) 0.0236(8) 0.0261(8) 0.0051(6) 0.0003(6) -0.0009(6) 
O6 0.0254(8) 0.0198(7) 0.0224(8) 0.0038(6) 0.0056(6) 0.0053(6) 
O7 0.0530(12) 0.0509(13) 0.0204(9) 0.0148(8) 0.0084(8) -0.0009(10) 
O8 0.0287(8) 0.0140(7) 0.0225(7) -0.0044(6) 0.0086(6) -0.0035(6) 
O9 0.0284(8) 0.0133(7) 0.0248(8) -0.0046(6) 0.0076(6) -0.0054(6) 
O10 0.0288(8) 0.0178(7) 0.0206(7) -0.0062(6) 0.0066(6) -0.0084(6) 
O11 0.0178(6) 0.0127(6) 0.0209(7) 0.0019(6) 0.0036(5) 0.0000(6) 
N1 0.0217(8) 0.0132(7) 0.0167(8) -0.0021(6) -0.0022(6) -0.0027(7) 
N2 0.0250(9) 0.0107(7) 0.0142(8) -0.0015(6) 0.0039(6) 0.0033(6) 
N3 0.0268(9) 0.0157(8) 0.0198(9) 0.0008(7) 0.0012(7) -0.0021(7) 
N4 0.0276(9) 0.0180(8) 0.0209(9) 0.0017(7) 0.0049(7) 0.0015(7) 
C1 0.0280(11) 0.0126(9) 0.0405(13) -0.0079(9) 0.0069(10) 0.0040(8) 
C2 0.0140(8) 0.0147(8) 0.0179(9) -0.0002(7) 0.0010(7) 0.0010(7) 
C3 0.0182(10) 0.0241(11) 0.0297(11) -0.0044(9) 0.0057(8) 0.0050(8) 
C4 0.0127(9) 0.0347(13) 0.0353(13) -0.0032(10) 0.0047(9) 0.0015(9) 
C5 0.0132(9) 0.0263(11) 0.0280(11) -0.0007(9) 0.0015(8) -0.0036(8) 
C6 0.0138(8) 0.0161(9) 0.0164(9) 0.0021(7) -0.0004(7) -0.0014(7) 
C7 0.0133(8) 0.0125(8) 0.0133(8) 0.0017(6) 0.0006(6) 0.0011(7) 
C8 0.0191(9) 0.0166(9) 0.0181(9) 0.0007(7) -0.0044(7) -0.0056(7) 
C9 0.0304(12) 0.0194(10) 0.0275(11) -0.0114(9) -0.0052(9) -0.0023(9) 
C10 0.0352(12) 0.0123(9) 0.0272(11) -0.0048(8) 0.0017(9) -0.0028(9) 
C11 0.0333(12) 0.0145(9) 0.0233(11) -0.0078(8) 0.0020(9) 0.0034(8) 
C12 0.0275(10) 0.0133(8) 0.0169(9) 0.0010(7) 0.0073(8) 0.0079(8) 
C13 0.0179(9) 0.0169(9) 0.0187(9) 0.0018(8) 0.0046(7) 0.0057(8) 
C14 0.0228(10) 0.0233(11) 0.0321(12) 0.0031(9) 0.0066(9) 0.0114(9) 
C15 0.0141(9) 0.0320(12) 0.0370(13) 0.0042(10) 0.0046(9) 0.0087(9) 
C16 0.0149(9) 0.0272(11) 0.0267(11) 0.0037(9) -0.0006(8) 0.0013(8) 
C17 0.0147(8) 0.0148(9) 0.0170(9) 0.0028(7) 0.0026(7) 0.0020(7) 
C18 0.0141(8) 0.0137(8) 0.0143(8) 0.0035(7) 0.0027(7) 0.0030(7) 
C19 0.0191(10) 0.0190(10) 0.0254(11) -0.0007(8) -0.0054(8) -0.0055(8) 
C20 0.0242(10) 0.0197(10) 0.0207(10) 0.0029(8) 0.0027(8) 0.0017(8) 
C21 0.0508(17) 0.0468(16) 0.0222(12) 0.0099(11) 0.0107(11) -0.0002(14) 
Dy1 0.01102(4) 0.00814(4) 0.01382(4) -0.00149(3) 0.00118(3) 0.00007(3) 
Ni2 0.01375(11) 0.00818(10) 0.01280(11) -0.00150(8) 0.00087(8) 0.00049(8) 
O18 0.0299(9) 0.0256(8) 0.0229(8) -0.0006(7) 0.0024(6) 0.0014(7) 
N5 0.0460(15) 0.0470(16) 0.0648(19) -0.0200(15) 0.0123(14) -0.0057(13) 
C22 0.0316(13) 0.0404(15) 0.0294(12) -0.0040(11) 0.0087(10) 0.0043(11) 
C23 0.063(2) 0.0341(14) 0.0339(14) -0.0043(12) 0.0181(14) -0.0067(14) 

_refine_ls_extinction_method 
    'None'
 
loop_
 _geom_bond_atom_site_label_1
 _geom_bond_site_symmetry_1
 _geom_bond_atom_site_label_2
 _geom_bond_site_symmetry_2
 _geom_bond_distance
 _geom_bond_publ_flag
O15 . N7 . 1.260(3)    yes
O16 . N7 . 1.262(3)    yes
O17 . N7 . 1.217(3)    yes
O12 . N6 . 1.238(3)    yes
O13 . N6 . 1.240(3)    yes
O14 . N6 . 1.254(3)    yes
O1 . C1 . 1.434(2)    yes
O1 . C2 . 1.391(2)    yes
O1 . Dy1 . 2.4691(14)    yes
O2 . C7 . 1.321(2)    yes
O2 . Dy1 . 2.3073(14)    yes
O2 . Ni2 . 2.0130(14)    yes
O3 . C18 . 1.316(2)    yes
O3 . Dy1 . 2.2942(14)    yes
O3 . Ni2 . 2.0206(14)    yes
O4 . C17 . 1.387(2)    yes
O4 . C19 . 1.439(2)    yes
O4 . Dy1 . 2.4746(14)    yes
O5 . N3 . 1.271(3)    yes
O5 . Dy1 . 2.4885(16)    yes
O6 . N3 . 1.270(2)    yes
O6 . Dy1 . 2.4536(16)    yes
O7 . N3 . 1.210(3)    yes
O8 . Dy1 . 2.4212(16)    yes
O8 . H1 . 0.816    no
O8 . H2 . 0.836    no
O9 . Dy1 . 2.4379(15)    yes
O9 . H3 . 0.835    no
O9 . H4 . 0.820    no
O10 . Dy1 . 2.3347(15)    yes
O10 . H5 . 0.847    no
O10 . H6 . 0.823    no
O11 . Ni2 . 2.1700(15)    yes
O11 . H8 . 0.834    no
O11 . H7 . 0.827    no
N1 . C8 . 1.277(3)    yes
N1 . C9 . 1.471(3)    yes
N1 . Ni2 . 2.0186(17)    yes
N2 . C11 . 1.474(3)    yes
N2 . C12 . 1.273(3)    yes
N2 . Ni2 . 2.0294(17)    yes
N4 . C20 . 1.131(3)    yes
N4 . Ni2 . 2.1050(19)    yes
C1 . H13 . 0.978    no
C1 . H11 . 0.954    no
C1 . H12 . 0.968    no
C2 . C3 . 1.375(3)    yes
C2 . C7 . 1.406(3)    yes
C3 . C4 . 1.392(3)    yes
C3 . H31 . 0.947    no
C4 . C5 . 1.371(3)    yes
C4 . H41 . 0.930    no
C5 . C6 . 1.405(3)    yes
C5 . H51 . 0.943    no
C6 . C7 . 1.405(3)    yes
C6 . C8 . 1.449(3)    yes
C8 . H81 . 0.944    no
C9 . C10 . 1.512(3)    yes
C9 . H91 . 0.974    no
C9 . H92 . 0.977    no
C10 . C11 . 1.513(3)    yes
C10 . H102 . 0.972    no
C10 . H101 . 0.977    no
C11 . H112 . 0.974    no
C11 . H111 . 0.969    no
C12 . C13 . 1.450(3)    yes
C12 . H121 . 0.946    no
C13 . C14 . 1.412(3)    yes
C13 . C18 . 1.403(3)    yes
C14 . C15 . 1.369(4)    yes
C14 . H141 . 0.942    no
C15 . C16 . 1.394(3)    yes
C15 . H151 . 0.934    no
C16 . C17 . 1.376(3)    yes
C16 . H161 . 0.926    no
C17 . C18 . 1.407(3)    yes
C19 . H191 . 0.974    no
C19 . H193 . 0.969    no
C19 . H192 . 0.958    no
C20 . C21 . 1.448(3)    yes
C21 . H212 . 0.953    no
C21 . H211 . 0.960    no
C21 . H213 . 0.959    no
O18 . H10 . 0.813    no
O18 . H9 . 0.828    no
N5 . C22 . 1.128(4)    yes
C22 . C23 . 1.448(4)    yes
C23 . H232 . 0.969    no
C23 . H233 . 0.964    no
C23 . H231 . 0.967    no
loop_
 _geom_angle_atom_site_label_1
 _geom_angle_site_symmetry_1
 _geom_angle_atom_site_label_2
 _geom_angle_site_symmetry_2
 _geom_angle_atom_site_label_3
 _geom_angle_site_symmetry_3
 _geom_angle
 _geom_angle_publ_flag
O16 . N7 . O15 . 117.93(19)    yes
O16 . N7 . O17 . 120.8(2)    yes
O15 . N7 . O17 . 121.3(2)    yes
O14 . N6 . O13 . 119.5(2)    yes
O14 . N6 . O12 . 120.1(2)    yes
O13 . N6 . O12 . 120.5(2)    yes
C1 . O1 . C2 . 116.42(16)    yes
C1 . O1 . Dy1 . 126.24(13)    yes
C2 . O1 . Dy1 . 117.31(11)    yes
C7 . O2 . Dy1 . 123.56(12)    yes
C7 . O2 . Ni2 . 125.57(12)    yes
Dy1 . O2 . Ni2 . 106.52(6)    yes
C18 . O3 . Dy1 . 124.33(12)    yes
C18 . O3 . Ni2 . 127.14(13)    yes
Dy1 . O3 . Ni2 . 106.74(6)    yes
C17 . O4 . C19 . 115.69(16)    yes
C17 . O4 . Dy1 . 117.15(11)    yes
C19 . O4 . Dy1 . 126.43(13)    yes
N3 . O5 . Dy1 . 95.49(12)    yes
N3 . O6 . Dy1 . 97.19(12)    yes
Dy1 . O8 . H1 . 117.6    no
Dy1 . O8 . H2 . 122.4    no
H1 . O8 . H2 . 103.6    no
Dy1 . O9 . H3 . 120.9    no
Dy1 . O9 . H4 . 129.4    no
H3 . O9 . H4 . 107.3    no
Dy1 . O10 . H5 . 126.7    no
Dy1 . O10 . H6 . 124.4    no
H5 . O10 . H6 . 108.4    no
Ni2 . O11 . H8 . 113.6    no
Ni2 . O11 . H7 . 115.6    no
H8 . O11 . H7 . 103.9    no
C8 . N1 . C9 . 116.76(18)    yes
C8 . N1 . Ni2 . 124.25(14)    yes
C9 . N1 . Ni2 . 118.73(15)    yes
C11 . N2 . C12 . 115.73(18)    yes
C11 . N2 . Ni2 . 119.65(14)    yes
C12 . N2 . Ni2 . 124.45(15)    yes
O5 . N3 . O6 . 115.72(18)    yes
O5 . N3 . O7 . 122.3(2)    yes
O6 . N3 . O7 . 122.0(2)    yes
C20 . N4 . Ni2 . 172.83(19)    yes
O1 . C1 . H13 . 106.5    no
O1 . C1 . H11 . 108.7    no
H13 . C1 . H11 . 111.4    no
O1 . C1 . H12 . 108.4    no
H13 . C1 . H12 . 109.9    no
H11 . C1 . H12 . 111.7    no
O1 . C2 . C3 . 124.28(19)    yes
O1 . C2 . C7 . 113.59(16)    yes
C3 . C2 . C7 . 122.13(19)    yes
C2 . C3 . C4 . 119.5(2)    yes
C2 . C3 . H31 . 120.8    no
C4 . C3 . H31 . 119.7    no
C3 . C4 . C5 . 119.7(2)    yes
C3 . C4 . H41 . 119.1    no
C5 . C4 . H41 . 121.2    no
C4 . C5 . C6 . 121.4(2)    yes
C4 . C5 . H51 . 119.2    no
C6 . C5 . H51 . 119.3    no
C5 . C6 . C7 . 119.39(19)    yes
C5 . C6 . C8 . 116.67(19)    yes
C7 . C6 . C8 . 123.92(18)    yes
C2 . C7 . C6 . 117.79(18)    yes
C2 . C7 . O2 . 118.19(17)    yes
C6 . C7 . O2 . 124.02(18)    yes
C6 . C8 . N1 . 127.29(19)    yes
C6 . C8 . H81 . 115.8    no
N1 . C8 . H81 . 117.0    no
N1 . C9 . C10 . 111.55(18)    yes
N1 . C9 . H91 . 107.9    no
C10 . C9 . H91 . 108.9    no
N1 . C9 . H92 . 108.7    no
C10 . C9 . H92 . 110.0    no
H91 . C9 . H92 . 109.6    no
C9 . C10 . C11 . 114.2(2)    yes
C9 . C10 . H102 . 108.0    no
C11 . C10 . H102 . 108.3    no
C9 . C10 . H101 . 109.5    no
C11 . C10 . H101 . 107.3    no
H102 . C10 . H101 . 109.5    no
C10 . C11 . N2 . 113.39(18)    yes
C10 . C11 . H112 . 108.1    no
N2 . C11 . H112 . 108.4    no
C10 . C11 . H111 . 108.5    no
N2 . C11 . H111 . 110.3    no
H112 . C11 . H111 . 108.0    no
N2 . C12 . C13 . 128.03(19)    yes
N2 . C12 . H121 . 118.3    no
C13 . C12 . H121 . 113.6    no
C12 . C13 . C14 . 116.76(19)    yes
C12 . C13 . C18 . 124.39(18)    yes
C14 . C13 . C18 . 118.8(2)    yes
C13 . C14 . C15 . 121.6(2)    yes
C13 . C14 . H141 . 117.9    no
C15 . C14 . H141 . 120.5    no
C14 . C15 . C16 . 120.0(2)    yes
C14 . C15 . H151 . 120.7    no
C16 . C15 . H151 . 119.3    no
C15 . C16 . C17 . 119.0(2)    yes
C15 . C16 . H161 . 121.3    no
C17 . C16 . H161 . 119.6    no
O4 . C17 . C16 . 124.52(19)    yes
O4 . C17 . C18 . 113.08(16)    yes
C16 . C17 . C18 . 122.4(2)    yes
C17 . C18 . C13 . 118.08(18)    yes
C17 . C18 . O3 . 117.83(17)    yes
C13 . C18 . O3 . 124.09(18)    yes
O4 . C19 . H191 . 106.7    no
O4 . C19 . H193 . 110.3    no
H191 . C19 . H193 . 111.5    no
O4 . C19 . H192 . 108.3    no
H191 . C19 . H192 . 110.9    no
H193 . C19 . H192 . 109.1    no
N4 . C20 . C21 . 179.8(3)    yes
C20 . C21 . H212 . 109.0    no
C20 . C21 . H211 . 105.2    no
H212 . C21 . H211 . 111.6    no
C20 . C21 . H213 . 108.1    no
H212 . C21 . H213 . 111.9    no
H211 . C21 . H213 . 110.7    no
O5 . Dy1 . O4 . 122.91(5)    yes
O5 . Dy1 . O1 . 75.12(5)    yes
O4 . Dy1 . O1 . 155.33(5)    yes
O5 . Dy1 . O6 . 51.59(5)    yes
O4 . Dy1 . O6 . 72.89(5)    yes
O1 . Dy1 . O6 . 126.66(5)    yes
O5 . Dy1 . O9 . 70.85(5)    yes
O4 . Dy1 . O9 . 78.16(5)    yes
O1 . Dy1 . O9 . 94.58(5)    yes
O6 . Dy1 . O9 . 68.49(5)    yes
O5 . Dy1 . O8 . 144.61(5)    yes
O4 . Dy1 . O8 . 89.71(5)    yes
O1 . Dy1 . O8 . 78.99(5)    yes
O6 . Dy1 . O8 . 147.56(5)    yes
O9 . Dy1 . O8 . 135.54(5)    yes
O5 . Dy1 . O10 . 126.43(6)    yes
O4 . Dy1 . O10 . 79.47(5)    yes
O1 . Dy1 . O10 . 75.98(5)    yes
O6 . Dy1 . O10 . 131.79(6)    yes
O9 . Dy1 . O10 . 67.67(5)    yes
O5 . Dy1 . O2 . 73.15(5)    yes
O4 . Dy1 . O2 . 132.46(5)    yes
O1 . Dy1 . O2 . 65.54(5)    yes
O6 . Dy1 . O2 . 97.11(5)    yes
O9 . Dy1 . O2 . 142.36(5)    yes
O5 . Dy1 . O3 . 105.15(5)    yes
O4 . Dy1 . O3 . 65.03(5)    yes
O1 . Dy1 . O3 . 130.65(5)    yes
O6 . Dy1 . O3 . 73.34(5)    yes
O9 . Dy1 . O3 . 133.03(5)    yes
O8 . Dy1 . O10 . 68.10(5)    yes
O8 . Dy1 . O2 . 74.37(5)    yes
O10 . Dy1 . O2 . 130.22(5)    yes
O8 . Dy1 . O3 . 74.52(5)    yes
O10 . Dy1 . O3 . 127.84(5)    yes
O2 . Dy1 . O3 . 67.56(5)    yes
O11 . Ni2 . N4 . 178.66(7)    yes
O11 . Ni2 . N2 . 91.27(6)    yes
N4 . Ni2 . N2 . 88.48(7)    yes
O11 . Ni2 . O3 . 83.87(6)    yes
N4 . Ni2 . O3 . 94.82(7)    yes
N2 . Ni2 . O3 . 91.31(6)    yes
O11 . Ni2 . N1 . 89.97(6)    yes
N4 . Ni2 . N1 . 91.37(8)    yes
N2 . Ni2 . N1 . 99.35(7)    yes
O3 . Ni2 . N1 . 167.82(7)    yes
O11 . Ni2 . O2 . 88.92(6)    yes
N4 . Ni2 . O2 . 91.10(7)    yes
N2 . Ni2 . O2 . 169.97(7)    yes
O3 . Ni2 . O2 . 78.74(6)    yes
N1 . Ni2 . O2 . 90.68(7)    yes
H10 . O18 . H9 . 113.2    no
N5 . C22 . C23 . 179.6(3)    yes
C22 . C23 . H232 . 110.6    no
C22 . C23 . H233 . 107.3    no
H232 . C23 . H233 . 110.6    no
C22 . C23 . H231 . 109.9    no
H232 . C23 . H231 . 108.7    no
H233 . C23 . H231 . 109.8    no
loop_
 _geom_hbond_atom_site_label_D
 _geom_hbond_site_symmetry_D
 _geom_hbond_atom_site_label_H
 _geom_hbond_site_symmetry_H
 _geom_hbond_atom_site_label_A
 _geom_hbond_site_symmetry_A
 _geom_hbond_angle_DHA
 _geom_hbond_distance_DH
 _geom_hbond_distance_HA
 _geom_hbond_distance_DA
 _geom_hbond_publ_flag
C15 . H151 . O14 2_666 159 0.93 2.50 3.393(3)    yes
C19 . H192 . O17 2_666 139 0.96 2.49 3.267(3)    yes
C21 . H213 . O14 4_564 130 0.96 2.48 3.178(3)    yes
O9 . H3 . O18 . 169 0.84 1.91 2.731(3)    yes
O11 . H8 . O16 . 167 0.83 1.98 2.804(3)    yes
O8 . H1 . O11 . 159 0.82 1.98 2.757(3)    yes
O11 . H7 . O13 2_566 173 0.83 1.92 2.746(3)    yes
O11 . H7 . N6 2_566 159 0.83 2.59 3.376(3)    yes
O9 . H4 . O16 1_565 171 0.82 1.96 2.772(3)    yes
O10 . H5 . O14 . 161 0.85 1.83 2.647(3)    yes
O8 . H2 . O12 . 167 0.84 2.01 2.828(3)    yes
O10 . H6 . O15 1_565 164 0.82 1.92 2.719(3)    yes
O10 . H6 . N7 1_565 146 0.82 2.59 3.300(3)    yes
O18 . H10 . O15 2_666 172 0.81 2.05 2.854(3)    yes
O18 . H9 . N5 . 176 0.83 2.08 2.903(3)    yes
